# Supplementary material
Source: publisher figshare collection journal article supplement (https://acs.figshare.com/ndownloader/files/4617238)
Supplement: Supplementary file 1 [file 4617238]

; "Carbene and carbonyl transfer from [W(CO)5(carbene)] to pallladium, affording Pd(II) carbene acyl complexes"  
; Isabel Meana, Ana C. Alb�niz, Pablo Espinet

;Compound 4
data_im72a 
  
_audit_creation_method            SHELXL-97 
_chemical_name_systematic 
; 
 ? 
; 
_chemical_name_common             ? 
_chemical_melting_point           ? 
_chemical_formula_moiety          ? 
_chemical_formula_sum 
 'C26 H36 Cl2 N2 O2 Pd2' 
_chemical_formula_weight          692.27 
  
loop_ 
 _atom_type_symbol 
 _atom_type_description 
 _atom_type_scat_dispersion_real 
 _atom_type_scat_dispersion_imag 
 _atom_type_scat_source 
 'C'  'C'   0.0033   0.0016 
 'International Tables Vol C Tables 4.2.6.8 and 6.1.1.4' 
 'H'  'H'   0.0000   0.0000 
 'International Tables Vol C Tables 4.2.6.8 and 6.1.1.4' 
 'N'  'N'   0.0061   0.0033 
 'International Tables Vol C Tables 4.2.6.8 and 6.1.1.4' 
 'O'  'O'   0.0106   0.0060 
 'International Tables Vol C Tables 4.2.6.8 and 6.1.1.4' 
 'Cl'  'Cl'   0.1484   0.1585 
 'International Tables Vol C Tables 4.2.6.8 and 6.1.1.4' 
 'Pd'  'Pd'  -0.9988   1.0072 
 'International Tables Vol C Tables 4.2.6.8 and 6.1.1.4' 
  
_symmetry_cell_setting            Triclinic 
_symmetry_space_group_name_H-M    P1 
  
loop_ 
 _symmetry_equiv_pos_as_xyz 
 'x, y, z' 
  
_cell_length_a                    8.109(2) 
_cell_length_b                    8.126(2) 
_cell_length_c                    12.537(4) 
_cell_angle_alpha                 102.591(5) 
_cell_angle_beta                  101.595(5) 
_cell_angle_gamma                 109.386(5) 
_cell_volume                      726.3(4) 
_cell_formula_units_Z             1 
_cell_measurement_temperature     298(2) 
_cell_measurement_reflns_used     ? 
_cell_measurement_theta_min       ? 
_cell_measurement_theta_max       ? 
  
_exptl_crystal_description        prism 
_exptl_crystal_colour             yellow 
_exptl_crystal_size_max           0.11 
_exptl_crystal_size_mid           0.07 
_exptl_crystal_size_min           0.02 
_exptl_crystal_density_meas       ? 
_exptl_crystal_density_diffrn     1.583 
_exptl_crystal_density_method     'not measured' 
_exptl_crystal_F_000              348 
_exptl_absorpt_coefficient_mu     1.446 
_exptl_absorpt_correction_type    multi-scan 
_exptl_absorpt_correction_T_min   0.632089
_exptl_absorpt_correction_T_max   1 
_exptl_absorpt_process_details    '(G.M. SheldricK, SADABS, 1996)' 
  
_exptl_special_details 
; 
 ? 
; 
  
_diffrn_ambient_temperature       298(2) 
_diffrn_radiation_wavelength      0.71073 
_diffrn_radiation_type            MoK\a 
_diffrn_radiation_source          'fine-focus sealed tube' 
_diffrn_radiation_monochromator   graphite 
_diffrn_measurement_device_type   'Bruker P4' 
_diffrn_measurement_method        '\w scans' 
_diffrn_detector_area_resol_mean  ? 
_diffrn_standards_number          ? 
_diffrn_standards_interval_count  ? 
_diffrn_standards_interval_time   ? 
_diffrn_standards_decay_%         ? 
_diffrn_reflns_number             6926 
_diffrn_reflns_av_R_equivalents   0.0618 
_diffrn_reflns_av_sigmaI/netI     0.0878 
_diffrn_reflns_limit_h_min        -10 
_diffrn_reflns_limit_h_max        10 
_diffrn_reflns_limit_k_min        -10 
_diffrn_reflns_limit_k_max        10 
_diffrn_reflns_limit_l_min        0 
_diffrn_reflns_limit_l_max        16 
_diffrn_reflns_theta_min          1.74 
_diffrn_reflns_theta_max          28.34 
_reflns_number_total              3539 
_reflns_number_gt                 2684 
_reflns_threshold_expression      >2sigma(I) 
  
_computing_data_collection        'Bruker XSCANS' 
_computing_cell_refinement        'Bruker XSCANS' 
_computing_data_reduction         'Bruker SHELXTL' 
_computing_structure_solution     'SHELXS-97 (Sheldrick, 1990)' 
_computing_structure_refinement   'SHELXL-97 (Sheldrick, 1997)' 
_computing_molecular_graphics     'Bruker SHELXTL' 
_computing_publication_material   'Bruker SHELXTL' 
  
_refine_special_details 
; 
 Refinement of F^2^ against ALL reflections.  The weighted R-factor wR and 
 goodness of fit S are based on F^2^, conventional R-factors R are based 
 on F, with F set to zero for negative F^2^. The threshold expression of 
 F^2^ > 2sigma(F^2^) is used only for calculating R-factors(gt) etc. and is 
 not relevant to the choice of reflections for refinement.  R-factors based 
 on F^2^ are statistically about twice as large as those based on F, and R- 
 factors based on ALL data will be even larger. 
; 
  
_refine_ls_structure_factor_coef  Fsqd 
_refine_ls_matrix_type            full 
_refine_ls_weighting_scheme       calc 
_refine_ls_weighting_details 
 'calc w=1/[\s^2^(Fo^2^)+(0.1331P)^2^+0.0000P] where P=(Fo^2^+2Fc^2^)/3' 
_atom_sites_solution_primary      direct 
_atom_sites_solution_secondary    difmap 
_atom_sites_solution_hydrogens    geom 
_refine_ls_hydrogen_treatment     constr 
_refine_ls_extinction_method      none 
_refine_ls_extinction_coef        ?  
_refine_ls_number_reflns          3539 
_refine_ls_number_parameters      308 
_refine_ls_number_restraints      3 
_refine_ls_R_factor_all           0.0958 
_refine_ls_R_factor_gt            0.0735 
_refine_ls_wR_factor_ref          0.2138 
_refine_ls_wR_factor_gt           0.1971 
_refine_ls_goodness_of_fit_ref    1.069 
_refine_ls_restrained_S_all       1.069 
_refine_ls_shift/su_max           1.547 
_refine_ls_shift/su_mean          0.098 
  
loop_ 
 _atom_site_label 
 _atom_site_type_symbol 
 _atom_site_fract_x 
 _atom_site_fract_y 
 _atom_site_fract_z 
 _atom_site_U_iso_or_equiv 
 _atom_site_adp_type 
 _atom_site_occupancy 
 _atom_site_symmetry_multiplicity 
 _atom_site_calc_flag 
 _atom_site_refinement_flags 
 _atom_site_disorder_assembly 
 _atom_site_disorder_group 
Pd1 Pd 0.14475(11) 0.37962(10) 0.40184(8) 0.0357(5) Uani 1 1 d . . . 
Cl1 Cl 0.0258(17) 0.3943(12) 0.2053(9) 0.060(3) Uani 1 1 d . . . 
C1 C 0.250(6) 0.365(5) 0.568(3) 0.064(11) Uani 1 1 d . . . 
C2 C 0.435(5) 0.360(5) 0.583(3) 0.058(10) Uani 1 1 d . . . 
H2A H 0.4854 0.3650 0.6602 0.087 Uiso 1 1 calc R . . 
H2B H 0.5139 0.4633 0.5668 0.087 Uiso 1 1 calc R . . 
H2C H 0.4258 0.2487 0.5313 0.087 Uiso 1 1 calc R . . 
O1 O 0.165(4) 0.350(4) 0.627(2) 0.058(8) Uani 1 1 d . . . 
C5 C 0.206(4) 0.646(5) 0.485(3) 0.043(8) Uani 1 1 d . . . 
N1 N 0.083(4) 0.703(3) 0.519(3) 0.050(7) Uani 1 1 d . . . 
C6 C -0.116(4) 0.559(6) 0.506(3) 0.057(10) Uani 1 1 d . . . 
H6A H -0.1122 0.4402 0.5033 0.068 Uiso 1 1 calc R . . 
H6B H -0.1553 0.5997 0.5715 0.068 Uiso 1 1 calc R . . 
C7 C -0.240(3) 0.545(4) 0.405(3) 0.060(8) Uani 1 1 d . . . 
H7A H -0.2299 0.6650 0.4034 0.090 Uiso 1 1 calc R . . 
H7B H -0.3622 0.4738 0.4033 0.090 Uiso 1 1 calc R . . 
H7C H -0.2122 0.4854 0.3402 0.090 Uiso 1 1 calc R . . 
C8 C 0.117(4) 0.891(4) 0.579(3) 0.062(11) Uani 1 1 d . . . 
H8A H 0.2229 0.9721 0.5646 0.074 Uiso 1 1 calc R . . 
H8B H 0.0129 0.9171 0.5466 0.074 Uiso 1 1 calc R . . 
C9 C 0.147(6) 0.931(5) 0.697(3) 0.073(11) Uani 1 1 d . . . 
H9A H 0.0491 0.8442 0.7124 0.110 Uiso 1 1 calc R . . 
H9B H 0.1531 1.0525 0.7280 0.110 Uiso 1 1 calc R . . 
H9C H 0.2610 0.9245 0.7314 0.110 Uiso 1 1 calc R . . 
C21 C 0.378(3) 0.778(3) 0.483(2) 0.029(6) Uani 1 1 d . . . 
C22 C 0.522(5) 0.867(4) 0.590(3) 0.039(7) Uani 1 1 d . . . 
H22 H 0.4938 0.8353 0.6528 0.046 Uiso 1 1 calc R . . 
C23 C 0.678(4) 0.979(4) 0.608(3) 0.053(9) Uani 1 1 d . . . 
H23 H 0.7627 1.0263 0.6805 0.064 Uiso 1 1 calc R . . 
C24 C 0.721(4) 1.033(3) 0.515(4) 0.072(13) Uani 1 1 d . . . 
H24 H 0.8350 1.1212 0.5227 0.087 Uiso 1 1 calc R . . 
C25 C 0.585(4) 0.947(4) 0.408(3) 0.063(11) Uani 1 1 d . . . 
H25 H 0.6039 0.9785 0.3434 0.076 Uiso 1 1 calc R . . 
C26 C 0.433(5) 0.824(6) 0.404(3) 0.073(12) Uani 1 1 d . . . 
H26 H 0.3523 0.7605 0.3307 0.088 Uiso 1 1 calc R . . 
Pd2 Pd -0.04226(12) 0.07725(11) 0.11680(8) 0.0361(5) Uani 1 1 d . . . 
Cl2 Cl 0.0864(18) 0.0635(13) 0.3131(7) 0.058(3) Uani 1 1 d . . . 
C3 C -0.141(3) 0.088(3) -0.0329(17) 0.022(4) Uani 1 1 d . . . 
C4 C -0.326(5) 0.106(5) -0.050(3) 0.064(11) Uani 1 1 d . . . 
H4A H -0.3420 0.1644 -0.1082 0.096 Uiso 1 1 calc R . . 
H4B H -0.3286 0.1790 0.0202 0.096 Uiso 1 1 calc R . . 
H4C H -0.4224 -0.0133 -0.0738 0.096 Uiso 1 1 calc R . . 
O2 O -0.061(4) 0.096(5) -0.106(2) 0.066(9) Uani 1 1 d . . . 
C10 C -0.088(4) -0.181(3) 0.040(2) 0.032(7) Uani 1 1 d . . . 
N2 N 0.028(3) -0.228(3) 0.0011(17) 0.032(6) Uani 1 1 d . . . 
C11 C -0.005(5) -0.430(4) -0.044(2) 0.041(7) Uani 1 1 d . . . 
H11A H -0.1011 -0.5003 -0.0167 0.049 Uiso 1 1 calc R . . 
H11B H 0.1052 -0.4458 -0.0115 0.049 Uiso 1 1 calc R . . 
C12 C -0.062(6) -0.510(5) -0.177(2) 0.074(12) Uani 1 1 d . . . 
H12A H -0.1650 -0.4846 -0.2109 0.112 Uiso 1 1 calc R . . 
H12B H -0.0951 -0.6397 -0.1988 0.112 Uiso 1 1 calc R . . 
H12C H 0.0387 -0.4535 -0.2043 0.112 Uiso 1 1 calc R . . 
C13 C 0.188(4) -0.108(4) 0.007(2) 0.038(6) Uani 1 1 d . . . 
H13A H 0.1723 0.0045 0.0037 0.045 Uiso 1 1 calc R . . 
H13B H 0.2197 -0.1531 -0.0602 0.045 Uiso 1 1 calc R . . 
C14 C 0.365(5) -0.053(5) 0.121(2) 0.084(13) Uani 1 1 d . . . 
H14A H 0.3219 -0.0904 0.1815 0.126 Uiso 1 1 calc R . . 
H14B H 0.4343 0.0770 0.1471 0.126 Uiso 1 1 calc R . . 
H14C H 0.4423 -0.1148 0.1007 0.126 Uiso 1 1 calc R . . 
C31 C -0.277(5) -0.322(4) 0.019(2) 0.037(7) Uani 1 1 d . . . 
C32 C -0.302(3) -0.370(3) 0.124(2) 0.034(5) Uani 1 1 d . . . 
H32 H -0.2080 -0.3187 0.1930 0.041 Uiso 1 1 calc R . . 
C33 C -0.487(5) -0.504(5) 0.114(4) 0.080(14) Uani 1 1 d . . . 
H33 H -0.5145 -0.5351 0.1771 0.096 Uiso 1 1 calc R . . 
C34 C -0.615(5) -0.579(5) 0.008(4) 0.073(12) Uani 1 1 d . . . 
H34 H -0.7296 -0.6654 0.0008 0.087 Uiso 1 1 calc R . . 
C35 C -0.583(6) -0.536(6) -0.084(4) 0.065(11) Uiso 1 1 d . . . 
H35 H -0.6773 -0.5965 -0.1528 0.079 Uiso 1 1 calc R . . 
C36 C -0.411(5) -0.399(5) -0.087(3) 0.052(8) Uani 1 1 d . . . 
H36 H -0.3936 -0.3675 -0.1525 0.062 Uiso 1 1 calc R . . 
  
loop_ 
 _atom_site_aniso_label 
 _atom_site_aniso_U_11 
 _atom_site_aniso_U_22 
 _atom_site_aniso_U_33 
 _atom_site_aniso_U_23 
 _atom_site_aniso_U_13 
 _atom_site_aniso_U_12 
Pd1 0.0455(14) 0.0283(11) 0.0272(11) 0.0052(9) 0.0100(10) 0.0096(10) 
Cl1 0.090(7) 0.031(4) 0.041(5) 0.000(4) 0.013(5) 0.013(4) 
C1 0.07(2) 0.049(18) 0.09(3) 0.040(17) 0.033(19) 0.029(16) 
C2 0.038(16) 0.08(2) 0.055(18) 0.006(16) 0.006(13) 0.039(16) 
O1 0.068(17) 0.079(19) 0.039(14) 0.021(13) 0.032(13) 0.032(15) 
C5 0.041(14) 0.08(2) 0.031(14) 0.020(13) 0.017(11) 0.041(14) 
N1 0.047(13) 0.032(10) 0.060(16) 0.022(10) 0.025(11) -0.006(9) 
C6 0.029(12) 0.064(19) 0.08(2) 0.028(15) 0.036(13) 0.013(11) 
C7 0.015(8) 0.060(13) 0.10(2) 0.021(13) 0.026(11) 0.002(8) 
C8 0.039(14) 0.031(13) 0.11(3) 0.005(14) 0.031(15) 0.014(11) 
C9 0.10(2) 0.036(12) 0.07(2) -0.013(11) 0.054(18) 0.010(12) 
C21 0.019(9) 0.016(9) 0.045(14) 0.006(8) 0.001(8) 0.006(7) 
C22 0.054(16) 0.033(10) 0.029(11) 0.011(9) 0.004(10) 0.021(11) 
C23 0.032(10) 0.034(10) 0.058(15) -0.008(9) -0.019(8) 0.002(8) 
C24 0.026(14) 0.008(8) 0.14(3) -0.023(12) 0.003(16) -0.010(8) 
C25 0.031(14) 0.070(18) 0.051(14) 0.010(12) 0.017(11) -0.025(12) 
C26 0.07(2) 0.11(3) 0.038(15) 0.011(15) 0.011(14) 0.035(18) 
Pd2 0.0465(14) 0.0291(11) 0.0271(11) 0.0029(9) 0.0106(10) 0.0120(10) 
Cl2 0.112(8) 0.045(5) 0.026(4) 0.012(3) 0.011(4) 0.049(5) 
C3 0.028(10) 0.023(10) 0.006(6) -0.002(6) 0.004(6) 0.003(8) 
C4 0.043(18) 0.061(19) 0.064(19) 0.028(15) -0.012(13) 0.001(13) 
O2 0.053(16) 0.10(2) 0.040(14) 0.025(14) 0.000(12) 0.025(16) 
C10 0.036(12) 0.016(8) 0.016(10) -0.004(7) -0.002(8) -0.014(8) 
N2 0.057(15) 0.031(9) 0.024(9) 0.008(7) 0.014(8) 0.035(10) 
C11 0.070(18) 0.049(15) 0.027(9) 0.022(9) 0.015(9) 0.043(13) 
C12 0.15(3) 0.052(17) 0.033(13) 0.016(11) 0.009(15) 0.058(19) 
C13 0.047(13) 0.055(13) 0.020(9) 0.016(8) 0.016(8) 0.025(11) 
C14 0.10(3) 0.10(2) 0.022(11) 0.010(12) 0.003(12) 0.016(19) 
C31 0.068(17) 0.033(12) 0.016(8) 0.005(7) 0.027(9) 0.021(11) 
C32 0.018(8) 0.033(9) 0.041(12) 0.028(9) 0.002(7) -0.009(6) 
C33 0.08(2) 0.08(2) 0.13(3) 0.08(2) 0.04(2) 0.041(19) 
C34 0.046(19) 0.09(2) 0.11(3) 0.06(2) 0.035(18) 0.027(16) 
C36 0.035(12) 0.073(18) 0.032(12) 0.007(11) 0.007(10) 0.008(11) 
  
_geom_special_details 
; 
 All esds (except the esd in the dihedral angle between two l.s. planes) 
 are estimated using the full covariance matrix.  The cell esds are taken 
 into account individually in the estimation of esds in distances, angles 
 and torsion angles; correlations between esds in cell parameters are only 
 used when they are defined by crystal symmetry.  An approximate (isotropic) 
 treatment of cell esds is used for estimating esds involving l.s. planes. 
; 
  
loop_ 
 _geom_bond_atom_site_label_1 
 _geom_bond_atom_site_label_2 
 _geom_bond_distance 
 _geom_bond_site_symmetry_2 
 _geom_bond_publ_flag 
Pd1 C5 2.03(3) . ? 
Pd1 C1 2.13(4) . ? 
Pd1 Cl2 2.407(9) . ? 
Pd1 Cl1 2.503(11) . ? 
Cl1 Pd2 2.395(9) . ? 
C1 O1 1.11(5) . ? 
C1 C2 1.49(5) . ? 
C5 N1 1.33(4) . ? 
C5 C21 1.46(4) . ? 
N1 C8 1.45(4) . ? 
N1 C6 1.60(4) . ? 
C6 C7 1.40(5) . ? 
C8 C9 1.40(5) . ? 
C21 C26 1.25(4) . ? 
C21 C22 1.44(4) . ? 
C22 C23 1.23(5) . ? 
C23 C24 1.41(6) . ? 
C24 C25 1.41(5) . ? 
C25 C26 1.28(5) . ? 
Pd2 C3 1.92(2) . ? 
Pd2 C10 1.98(2) . ? 
Pd2 Cl2 2.514(8) . ? 
C3 O2 1.22(4) . ? 
C3 C4 1.53(5) . ? 
C10 N2 1.27(4) . ? 
C10 C31 1.52(4) . ? 
N2 C13 1.31(3) . ? 
N2 C11 1.52(3) . ? 
C11 C12 1.57(4) . ? 
C13 C14 1.67(4) . ? 
C31 C36 1.40(5) . ? 
C31 C32 1.48(4) . ? 
C32 C33 1.49(4) . ? 
C33 C34 1.37(6) . ? 
C34 C35 1.33(5) . ? 
C35 C36 1.48(5) . ? 
  
loop_ 
 _geom_angle_atom_site_label_1 
 _geom_angle_atom_site_label_2 
 _geom_angle_atom_site_label_3 
 _geom_angle 
 _geom_angle_site_symmetry_1 
 _geom_angle_site_symmetry_3 
 _geom_angle_publ_flag 
C5 Pd1 C1 84.8(13) . . ? 
C5 Pd1 Cl2 176.5(9) . . ? 
C1 Pd1 Cl2 92.0(11) . . ? 
C5 Pd1 Cl1 96.0(9) . . ? 
C1 Pd1 Cl1 178.8(13) . . ? 
Cl2 Pd1 Cl1 87.3(3) . . ? 
Pd2 Cl1 Pd1 93.0(3) . . ? 
O1 C1 C2 128(4) . . ? 
O1 C1 Pd1 121(3) . . ? 
C2 C1 Pd1 111(3) . . ? 
N1 C5 C21 120(3) . . ? 
N1 C5 Pd1 122(2) . . ? 
C21 C5 Pd1 115.8(18) . . ? 
C5 N1 C8 125(3) . . ? 
C5 N1 C6 121(3) . . ? 
C8 N1 C6 114(3) . . ? 
C7 C6 N1 109(3) . . ? 
C9 C8 N1 115(3) . . ? 
C26 C21 C22 110(3) . . ? 
C26 C21 C5 133(3) . . ? 
C22 C21 C5 117(3) . . ? 
C23 C22 C21 128(3) . . ? 
C22 C23 C24 117(3) . . ? 
C25 C24 C23 117(2) . . ? 
C26 C25 C24 118(3) . . ? 
C21 C26 C25 130(3) . . ? 
C3 Pd2 C10 86.5(10) . . ? 
C3 Pd2 Cl1 92.6(7) . . ? 
C10 Pd2 Cl1 177.0(9) . . ? 
C3 Pd2 Cl2 179.9(8) . . ? 
C10 Pd2 Cl2 93.6(8) . . ? 
Cl1 Pd2 Cl2 87.3(3) . . ? 
Pd1 Cl2 Pd2 92.4(3) . . ? 
O2 C3 C4 121(3) . . ? 
O2 C3 Pd2 125(2) . . ? 
C4 C3 Pd2 113.4(19) . . ? 
N2 C10 C31 120(2) . . ? 
N2 C10 Pd2 123.3(17) . . ? 
C31 C10 Pd2 117(2) . . ? 
C10 N2 C13 122(2) . . ? 
C10 N2 C11 121(2) . . ? 
C13 N2 C11 117(2) . . ? 
N2 C11 C12 115(2) . . ? 
N2 C13 C14 119(2) . . ? 
C36 C31 C32 125(3) . . ? 
C36 C31 C10 123(3) . . ? 
C32 C31 C10 112(2) . . ? 
C31 C32 C33 116(3) . . ? 
C34 C33 C32 118(3) . . ? 
C35 C34 C33 123(3) . . ? 
C34 C35 C36 126(4) . . ? 
C31 C36 C35 112(3) . . ? 
  
_diffrn_measured_fraction_theta_max    0.978 
_diffrn_reflns_theta_full              28.34 
_diffrn_measured_fraction_theta_full   0.978 
_refine_diff_density_max    1.501 
_refine_diff_density_min   -1.049 
_refine_diff_density_rms    0.240 

#===END


;Compound 5

data_im87 
  
_audit_creation_method            SHELXL-97 
_chemical_name_systematic 
; 
 ? 
; 
_chemical_name_common             ? 
_chemical_melting_point           ? 
_chemical_formula_moiety          ? 
_chemical_formula_sum 
 'C36 H40 Cl2 N2 O2 Pd2' 
_chemical_formula_weight          816.40 
  
loop_ 
 _atom_type_symbol 
 _atom_type_description 
 _atom_type_scat_dispersion_real 
 _atom_type_scat_dispersion_imag 
 _atom_type_scat_source 
 'C'  'C'   0.0033   0.0016 
 'International Tables Vol C Tables 4.2.6.8 and 6.1.1.4' 
 'H'  'H'   0.0000   0.0000 
 'International Tables Vol C Tables 4.2.6.8 and 6.1.1.4' 
 'N'  'N'   0.0061   0.0033 
 'International Tables Vol C Tables 4.2.6.8 and 6.1.1.4' 
 'O'  'O'   0.0106   0.0060 
 'International Tables Vol C Tables 4.2.6.8 and 6.1.1.4' 
 'Cl'  'Cl'   0.1484   0.1585 
 'International Tables Vol C Tables 4.2.6.8 and 6.1.1.4' 
 'Pd'  'Pd'  -0.9988   1.0072 
 'International Tables Vol C Tables 4.2.6.8 and 6.1.1.4' 
  
_symmetry_cell_setting            Orthorhombic 
_symmetry_space_group_name_H-M    Pbca 
  
loop_ 
 _symmetry_equiv_pos_as_xyz 
 'x, y, z' 
 '-x+1/2, -y, z+1/2' 
 '-x, y+1/2, -z+1/2' 
 'x+1/2, -y+1/2, -z' 
 '-x, -y, -z' 
 'x-1/2, y, -z-1/2' 
 'x, -y-1/2, z-1/2' 
 '-x-1/2, y-1/2, z' 
  
_cell_length_a                    15.724(4) 
_cell_length_b                    13.236(3) 
_cell_length_c                    16.927(4) 
_cell_angle_alpha                 90.00 
_cell_angle_beta                  90.00 
_cell_angle_gamma                 90.00 
_cell_volume                      3523.0(15) 
_cell_formula_units_Z             4 
_cell_measurement_temperature     298(2) 
_cell_measurement_reflns_used     ? 
_cell_measurement_theta_min       ? 
_cell_measurement_theta_max       ? 
  
_exptl_crystal_description        prism 
_exptl_crystal_colour             yellow 
_exptl_crystal_size_max           0.12 
_exptl_crystal_size_mid           0.1 
_exptl_crystal_size_min           0.04 
_exptl_crystal_density_meas       ? 
_exptl_crystal_density_diffrn     1.539 
_exptl_crystal_density_method     'not measured' 
_exptl_crystal_F_000              1648 
_exptl_absorpt_coefficient_mu     1.206 
_exptl_absorpt_correction_type    multi-scan 
_exptl_absorpt_correction_T_min   0.761338 
_exptl_absorpt_correction_T_max   1 
_exptl_absorpt_process_details    '(G.M. SheldricK, SADABS, 1996)' 
  
_exptl_special_details 
; 
 ? 
; 
  
_diffrn_ambient_temperature       298(2) 
_diffrn_radiation_wavelength      0.71073 
_diffrn_radiation_type            MoK\a 
_diffrn_radiation_source          'fine-focus sealed tube' 
_diffrn_radiation_monochromator   graphite 
_diffrn_measurement_device_type   'Bruker P4' 
_diffrn_measurement_method        '\w scans' 
_diffrn_detector_area_resol_mean  ? 
_diffrn_standards_number          ? 
_diffrn_standards_interval_count  ? 
_diffrn_standards_interval_time   ? 
_diffrn_standards_decay_%         ? 
_diffrn_reflns_number             30475 
_diffrn_reflns_av_R_equivalents   0.2266 
_diffrn_reflns_av_sigmaI/netI     0.1322 
_diffrn_reflns_limit_h_min        0 
_diffrn_reflns_limit_h_max        19 
_diffrn_reflns_limit_k_min        0 
_diffrn_reflns_limit_k_max        16 
_diffrn_reflns_limit_l_min        0 
_diffrn_reflns_limit_l_max        21 
_diffrn_reflns_theta_min          2.34 
_diffrn_reflns_theta_max          26.39 
_reflns_number_total              3608 
_reflns_number_gt                 1675 
_reflns_threshold_expression      >2sigma(I) 
  
_computing_data_collection        'Bruker XSCANS' 
_computing_cell_refinement        'Bruker XSCANS' 
_computing_data_reduction         'Bruker SHELXTL' 
_computing_structure_solution     'SHELXS-97 (Sheldrick, 1990)' 
_computing_structure_refinement   'SHELXL-97 (Sheldrick, 1997)' 
_computing_molecular_graphics     'Bruker SHELXTL' 
_computing_publication_material   'Bruker SHELXTL' 
  
_refine_special_details 
; 
 Refinement of F^2^ against ALL reflections.  The weighted R-factor wR and 
 goodness of fit S are based on F^2^, conventional R-factors R are based 
 on F, with F set to zero for negative F^2^. The threshold expression of 
 F^2^ > 2sigma(F^2^) is used only for calculating R-factors(gt) etc. and is 
 not relevant to the choice of reflections for refinement.  R-factors based 
 on F^2^ are statistically about twice as large as those based on F, and R- 
 factors based on ALL data will be even larger. 
; 
  
_refine_ls_structure_factor_coef  Fsqd 
_refine_ls_matrix_type            full 
_refine_ls_weighting_scheme       calc 
_refine_ls_weighting_details 
 'calc w=1/[\s^2^(Fo^2^)+(0.1049P)^2^+22.9391P] where P=(Fo^2^+2Fc^2^)/3' 
_atom_sites_solution_primary      direct 
_atom_sites_solution_secondary    difmap 
_atom_sites_solution_hydrogens    geom 
_refine_ls_hydrogen_treatment     constr 
_refine_ls_extinction_method      none 
_refine_ls_extinction_coef        ? 
_refine_ls_number_reflns          3608
_refine_ls_number_parameters      201 
_refine_ls_number_restraints      0 
_refine_ls_R_factor_all           0.1976 
_refine_ls_R_factor_gt            0.0852 
_refine_ls_wR_factor_ref          0.2492 
_refine_ls_wR_factor_gt           0.1811 
_refine_ls_goodness_of_fit_ref    1.039 
_refine_ls_restrained_S_all       1.039 
_refine_ls_shift/su_max           0.008 
_refine_ls_shift/su_mean          0.001 
  
loop_ 
 _atom_site_label 
 _atom_site_type_symbol 
 _atom_site_fract_x 
 _atom_site_fract_y 
 _atom_site_fract_z 
 _atom_site_U_iso_or_equiv 
 _atom_site_adp_type 
 _atom_site_occupancy 
 _atom_site_symmetry_multiplicity 
 _atom_site_calc_flag 
 _atom_site_refinement_flags 
 _atom_site_disorder_assembly 
 _atom_site_disorder_group 
Pd1 Pd 0.06615(5) 0.59344(7) 0.45557(5) 0.0407(3) Uani 1 1 d . . . 
Cl1 Cl -0.08449(18) 0.5677(3) 0.4701(2) 0.0577(10) Uani 1 1 d . . . 
C1 C 0.0461(7) 0.7242(11) 0.4021(8) 0.049(3) Uani 1 1 d . . . 
O1 O 0.0418(8) 0.8003(8) 0.4417(6) 0.083(3) Uani 1 1 d . . . 
C11 C 0.0305(8) 0.7237(12) 0.3167(8) 0.052(4) Uani 1 1 d . . . 
C12 C 0.0344(9) 0.6361(13) 0.2709(8) 0.061(4) Uani 1 1 d . . . 
H12 H 0.0484 0.5740 0.2931 0.073 Uiso 1 1 calc R . . 
C13 C 0.0163(10) 0.6454(16) 0.1909(11) 0.078(5) Uani 1 1 d . . . 
H13 H 0.0161 0.5875 0.1597 0.094 Uiso 1 1 calc R . . 
C14 C -0.0010(12) 0.735(2) 0.1566(12) 0.106(8) Uani 1 1 d . . . 
H14 H -0.0102 0.7384 0.1024 0.127 Uiso 1 1 calc R . . 
C15 C -0.0051(13) 0.8221(18) 0.2006(13) 0.105(8) Uani 1 1 d . . . 
H15 H -0.0202 0.8833 0.1775 0.125 Uiso 1 1 calc R . . 
C16 C 0.0130(11) 0.8165(13) 0.2774(11) 0.080(5) Uani 1 1 d . . . 
H16 H 0.0143 0.8760 0.3066 0.097 Uiso 1 1 calc R . . 
C2 C 0.1898(8) 0.6143(9) 0.4421(7) 0.045(3) Uani 1 1 d . . . 
N1 N 0.2396(6) 0.6502(8) 0.4964(7) 0.050(3) Uani 1 1 d . . . 
C3 C 0.2049(11) 0.6919(12) 0.5687(9) 0.070(4) Uani 1 1 d . . . 
H3A H 0.2372 0.6665 0.6133 0.083 Uiso 1 1 calc R . . 
H3B H 0.1465 0.6692 0.5747 0.083 Uiso 1 1 calc R . . 
C4 C 0.2068(14) 0.8035(16) 0.5695(12) 0.113(7) Uani 1 1 d . . . 
H4A H 0.2637 0.8264 0.5590 0.170 Uiso 1 1 calc R . . 
H4B H 0.1890 0.8276 0.6204 0.170 Uiso 1 1 calc R . . 
H4C H 0.1692 0.8292 0.5296 0.170 Uiso 1 1 calc R . . 
C5 C 0.3344(8) 0.6491(12) 0.4926(10) 0.067(4) Uani 1 1 d . . . 
H5A H 0.3522 0.6541 0.4379 0.081 Uiso 1 1 calc R . . 
H5B H 0.3565 0.7075 0.5206 0.081 Uiso 1 1 calc R . . 
C6 C 0.3705(14) 0.5555(18) 0.5280(16) 0.142(10) Uani 1 1 d . . . 
H6A H 0.3511 0.5490 0.5815 0.213 Uiso 1 1 calc R . . 
H6B H 0.4315 0.5593 0.5273 0.213 Uiso 1 1 calc R . . 
H6C H 0.3523 0.4980 0.4980 0.213 Uiso 1 1 calc R . . 
C21 C 0.2316(7) 0.5779(10) 0.3678(8) 0.051(3) Uani 1 1 d . . . 
C22 C 0.2313(11) 0.4771(13) 0.3486(9) 0.081(5) Uani 1 1 d . . . 
H22 H 0.2047 0.4297 0.3807 0.097 Uiso 1 1 calc R . . 
C23 C 0.2718(14) 0.4486(16) 0.2797(12) 0.112(8) Uani 1 1 d . . . 
H23 H 0.2750 0.3801 0.2679 0.135 Uiso 1 1 calc R . . 
C24 C 0.3069(13) 0.5147(15) 0.2289(10) 0.095(6) Uani 1 1 d . . . 
H24 H 0.3328 0.4929 0.1825 0.113 Uiso 1 1 calc R . . 
C25 C 0.3034(10) 0.6126(15) 0.2473(9) 0.082(5) Uani 1 1 d . . . 
H25 H 0.3273 0.6593 0.2128 0.098 Uiso 1 1 calc R . . 
C26 C 0.2659(9) 0.6465(13) 0.3148(9) 0.068(4) Uani 1 1 d . . . 
H26 H 0.2633 0.7154 0.3253 0.081 Uiso 1 1 calc R . . 
  
loop_ 
 _atom_site_aniso_label 
 _atom_site_aniso_U_11 
 _atom_site_aniso_U_22 
 _atom_site_aniso_U_33 
 _atom_site_aniso_U_23 
 _atom_site_aniso_U_13 
 _atom_site_aniso_U_12 
Pd1 0.0277(5) 0.0537(6) 0.0407(5) 0.0054(5) 0.0005(4) -0.0012(5) 
Cl1 0.0270(15) 0.071(2) 0.075(2) 0.0280(19) -0.0024(14) 0.0018(14) 
C1 0.025(7) 0.062(9) 0.060(9) -0.003(8) 0.003(6) -0.006(6) 
O1 0.120(10) 0.062(7) 0.066(7) -0.006(6) -0.010(7) 0.015(7) 
C11 0.030(6) 0.081(11) 0.045(8) 0.014(8) 0.004(6) 0.007(7) 
C12 0.043(8) 0.102(12) 0.038(8) -0.006(8) 0.006(6) -0.027(8) 
C13 0.069(11) 0.102(14) 0.062(11) 0.007(11) 0.006(9) -0.012(10) 
C14 0.071(13) 0.18(3) 0.066(13) 0.040(16) -0.015(10) -0.048(15) 
C15 0.125(18) 0.116(18) 0.074(14) 0.055(13) -0.038(13) -0.032(15) 
C16 0.100(14) 0.074(12) 0.067(12) 0.015(10) -0.009(10) 0.000(10) 
C2 0.038(7) 0.050(8) 0.048(8) 0.011(6) 0.001(6) -0.002(6) 
N1 0.033(6) 0.059(7) 0.058(7) 0.001(6) -0.001(6) -0.008(5) 
C3 0.067(10) 0.075(11) 0.067(10) -0.018(9) 0.003(8) -0.028(9) 
C4 0.112(17) 0.125(18) 0.103(16) -0.037(14) 0.006(13) -0.028(14) 
C5 0.030(7) 0.095(12) 0.078(11) -0.003(10) -0.002(7) -0.012(8) 
C6 0.081(15) 0.132(19) 0.21(3) 0.06(2) -0.017(17) -0.008(14) 
C21 0.031(7) 0.058(9) 0.064(9) -0.010(7) 0.005(6) 0.003(6) 
C22 0.105(14) 0.075(12) 0.064(10) -0.001(9) 0.032(10) -0.006(10) 
C23 0.15(2) 0.091(14) 0.096(14) -0.023(12) 0.061(14) -0.032(13) 
C24 0.115(16) 0.091(14) 0.078(13) -0.031(11) 0.046(12) -0.017(12) 
C25 0.061(10) 0.131(17) 0.054(9) 0.015(11) 0.017(8) -0.014(11) 
C26 0.063(10) 0.082(11) 0.058(9) 0.023(9) 0.016(8) 0.003(9) 
  
_geom_special_details 
; 
 All esds (except the esd in the dihedral angle between two l.s. planes) 
 are estimated using the full covariance matrix.  The cell esds are taken 
 into account individually in the estimation of esds in distances, angles 
 and torsion angles; correlations between esds in cell parameters are only 
 used when they are defined by crystal symmetry.  An approximate (isotropic) 
 treatment of cell esds is used for estimating esds involving l.s. planes. 
; 
  
loop_ 
 _geom_bond_atom_site_label_1 
 _geom_bond_atom_site_label_2 
 _geom_bond_distance 
 _geom_bond_site_symmetry_2 
 _geom_bond_publ_flag 
Pd1 C2 1.976(12) . ? 
Pd1 C1 1.978(14) . ? 
Pd1 Cl1 2.406(3) . ? 
Pd1 Cl1 2.493(3) 5_566 ? 
Cl1 Pd1 2.493(3) 5_566 ? 
C1 O1 1.211(16) . ? 
C1 C11 1.467(18) . ? 
C11 C12 1.40(2) . ? 
C11 C16 1.42(2) . ? 
C12 C13 1.39(2) . ? 
C13 C14 1.35(3) . ? 
C14 C15 1.37(3) . ? 
C15 C16 1.33(2) . ? 
C2 N1 1.298(15) . ? 
C2 C21 1.498(17) . ? 
N1 C3 1.449(17) . ? 
N1 C5 1.491(15) . ? 
C3 C4 1.48(2) . ? 
C5 C6 1.49(2) . ? 
C21 C22 1.37(2) . ? 
C21 C26 1.385(19) . ? 
C22 C23 1.38(2) . ? 
C23 C24 1.35(2) . ? 
C24 C25 1.33(2) . ? 
C25 C26 1.36(2) . ? 
  
loop_ 
 _geom_angle_atom_site_label_1 
 _geom_angle_atom_site_label_2 
 _geom_angle_atom_site_label_3 
 _geom_angle 
 _geom_angle_site_symmetry_1 
 _geom_angle_site_symmetry_3 
 _geom_angle_publ_flag 
C2 Pd1 C1 88.9(5) . . ? 
C2 Pd1 Cl1 179.2(4) . . ? 
C1 Pd1 Cl1 90.8(3) . . ? 
C2 Pd1 Cl1 93.7(3) . 5_566 ? 
C1 Pd1 Cl1 176.2(4) . 5_566 ? 
Cl1 Pd1 Cl1 86.61(11) . 5_566 ? 
Pd1 Cl1 Pd1 93.39(11) . 5_566 ? 
O1 C1 C11 122.6(14) . . ? 
O1 C1 Pd1 118.9(11) . . ? 
C11 C1 Pd1 118.3(11) . . ? 
C12 C11 C16 117.8(14) . . ? 
C12 C11 C1 122.9(13) . . ? 
C16 C11 C1 119.3(15) . . ? 
C13 C12 C11 117.3(17) . . ? 
C14 C13 C12 123(2) . . ? 
C13 C14 C15 120.9(19) . . ? 
C16 C15 C14 118(2) . . ? 
C15 C16 C11 123.0(19) . . ? 
N1 C2 C21 116.5(11) . . ? 
N1 C2 Pd1 124.3(9) . . ? 
C21 C2 Pd1 119.0(9) . . ? 
C2 N1 C3 120.6(11) . . ? 
C2 N1 C5 124.7(12) . . ? 
C3 N1 C5 114.6(12) . . ? 
N1 C3 C4 112.4(14) . . ? 
C6 C5 N1 111.8(14) . . ? 
C22 C21 C26 119.0(14) . . ? 
C22 C21 C2 120.6(13) . . ? 
C26 C21 C2 120.3(13) . . ? 
C21 C22 C23 117.6(16) . . ? 
C24 C23 C22 123.5(19) . . ? 
C25 C24 C23 117.7(17) . . ? 
C24 C25 C26 122.3(16) . . ? 
C25 C26 C21 119.7(16) . . ? 
  
_diffrn_measured_fraction_theta_max    1.000 
_diffrn_reflns_theta_full              26.39 
_diffrn_measured_fraction_theta_full   1.000 
_refine_diff_density_max    1.438 
_refine_diff_density_min   -1.129 
_refine_diff_density_rms    0.165 

#===END


; Compound 7

data_im105 
  
_audit_creation_method            SHELXL-97 
_chemical_name_systematic 
; 
 ? 
; 
_chemical_name_common             ? 
_chemical_melting_point           ? 
_chemical_formula_moiety          ? 
_chemical_formula_sum 
 'C36 H35 Cl N O P Pd' 
_chemical_formula_weight          670.47 
  
loop_ 
 _atom_type_symbol 
 _atom_type_description 
 _atom_type_scat_dispersion_real 
 _atom_type_scat_dispersion_imag 
 _atom_type_scat_source 
 'C'  'C'   0.0033   0.0016 
 'International Tables Vol C Tables 4.2.6.8 and 6.1.1.4' 
 'H'  'H'   0.0000   0.0000 
 'International Tables Vol C Tables 4.2.6.8 and 6.1.1.4' 
 'N'  'N'   0.0061   0.0033 
 'International Tables Vol C Tables 4.2.6.8 and 6.1.1.4' 
 'O'  'O'   0.0106   0.0060 
 'International Tables Vol C Tables 4.2.6.8 and 6.1.1.4' 
 'P'  'P'   0.1023   0.0942 
 'International Tables Vol C Tables 4.2.6.8 and 6.1.1.4' 
 'Cl'  'Cl'   0.1484   0.1585 
 'International Tables Vol C Tables 4.2.6.8 and 6.1.1.4' 
 'Pd'  'Pd'  -0.9988   1.0072 
 'International Tables Vol C Tables 4.2.6.8 and 6.1.1.4' 
  
_symmetry_cell_setting            Monoclinic 
_symmetry_space_group_name_H-M    P2(1)/n 
  
loop_ 
 _symmetry_equiv_pos_as_xyz 
 'x, y, z' 
 '-x+1/2, y+1/2, -z+1/2' 
 '-x, -y, -z' 
 'x-1/2, -y-1/2, z-1/2' 
  
_cell_length_a                    10.082(2) 
_cell_length_b                    33.052(8) 
_cell_length_c                    10.983(3) 
_cell_angle_alpha                 90.00 
_cell_angle_beta                  116.573(4) 
_cell_angle_gamma                 90.00 
_cell_volume                      3273.3(14) 
_cell_formula_units_Z             4 
_cell_measurement_temperature     298(2) 
_cell_measurement_reflns_used     ? 
_cell_measurement_theta_min       ? 
_cell_measurement_theta_max       ? 
  
_exptl_crystal_description        prism 
_exptl_crystal_colour             yellow 
_exptl_crystal_size_max           0.18 
_exptl_crystal_size_mid           0.09 
_exptl_crystal_size_min           0.04 
_exptl_crystal_density_meas       ? 
_exptl_crystal_density_diffrn     1.361 
_exptl_crystal_density_method     'not measured' 
_exptl_crystal_F_000              1376 
_exptl_absorpt_coefficient_mu     0.725 
_exptl_absorpt_correction_type    multi-scan 
_exptl_absorpt_correction_T_min   0.529641 
_exptl_absorpt_correction_T_max   1
_exptl_absorpt_process_details    '(G.M. SheldricK, SADABS, 1996)' 
  
_exptl_special_details 
; 
 ? 
; 
  
_diffrn_ambient_temperature       298(2) 
_diffrn_radiation_wavelength      0.71073 
_diffrn_radiation_type            MoK\a 
_diffrn_radiation_source          'fine-focus sealed tube' 
_diffrn_radiation_monochromator   graphite 
_diffrn_measurement_device_type   'Bruker P4' 
_diffrn_measurement_method        '\w scans' 
_diffrn_detector_area_resol_mean  ? 
_diffrn_standards_number          ? 
_diffrn_standards_interval_count  ? 
_diffrn_standards_interval_time   ? 
_diffrn_standards_decay_%         ? 
_diffrn_reflns_number             32993 
_diffrn_reflns_av_R_equivalents   0.1568 
_diffrn_reflns_av_sigmaI/netI     0.1304 
_diffrn_reflns_limit_h_min        -11 
_diffrn_reflns_limit_h_max        10 
_diffrn_reflns_limit_k_min        0 
_diffrn_reflns_limit_k_max        38 
_diffrn_reflns_limit_l_min        0 
_diffrn_reflns_limit_l_max        12 
_diffrn_reflns_theta_min          1.23 
_diffrn_reflns_theta_max          24.71 
_reflns_number_total              5687 
_reflns_number_gt                 3074 
_reflns_threshold_expression      >2sigma(I) 
  
_computing_data_collection        'Bruker XSCANS' 
_computing_cell_refinement        'Bruker XSCANS' 
_computing_data_reduction         'Bruker SHELXTL' 
_computing_structure_solution     'SHELXS-97 (Sheldrick, 1990)' 
_computing_structure_refinement   'SHELXL-97 (Sheldrick, 1997)' 
_computing_molecular_graphics     'Bruker SHELXTL' 
_computing_publication_material   'Bruker SHELXTL' 
  
_refine_special_details 
; 
 Refinement of F^2^ against ALL reflections.  The weighted R-factor wR and 
 goodness of fit S are based on F^2^, conventional R-factors R are based 
 on F, with F set to zero for negative F^2^. The threshold expression of 
 F^2^ > 2sigma(F^2^) is used only for calculating R-factors(gt) etc. and is 
 not relevant to the choice of reflections for refinement.  R-factors based 
 on F^2^ are statistically about twice as large as those based on F, and R- 
 factors based on ALL data will be even larger. 
; 
  
_refine_ls_structure_factor_coef  Fsqd 
_refine_ls_matrix_type            full 
_refine_ls_weighting_scheme       calc 
_refine_ls_weighting_details 
 'calc w=1/[\s^2^(Fo^2^)+(0.0927P)^2^+0.0000P] where P=(Fo^2^+2Fc^2^)/3' 
_atom_sites_solution_primary      direct 
_atom_sites_solution_secondary    difmap 
_atom_sites_solution_hydrogens    geom 
_refine_ls_hydrogen_treatment     constr 
_refine_ls_extinction_method      none 
_refine_ls_extinction_coef        ? 
_refine_ls_number_reflns          5687 
_refine_ls_number_parameters      372 
_refine_ls_number_restraints      0 
_refine_ls_R_factor_all           0.1407 
_refine_ls_R_factor_gt            0.0595 
_refine_ls_wR_factor_ref          0.1905 
_refine_ls_wR_factor_gt           0.1345 
_refine_ls_goodness_of_fit_ref    1.016 
_refine_ls_restrained_S_all       1.016 
_refine_ls_shift/su_max           0.013 
_refine_ls_shift/su_mean          0.001 
  
loop_ 
 _atom_site_label 
 _atom_site_type_symbol 
 _atom_site_fract_x 
 _atom_site_fract_y 
 _atom_site_fract_z 
 _atom_site_U_iso_or_equiv 
 _atom_site_adp_type 
 _atom_site_occupancy 
 _atom_site_symmetry_multiplicity 
 _atom_site_calc_flag 
 _atom_site_refinement_flags 
 _atom_site_disorder_assembly 
 _atom_site_disorder_group 
Pd1 Pd 0.16099(7) 0.102816(18) 0.89903(6) 0.0286(2) Uani 1 1 d . . . 
P1 P 0.0677(2) 0.16499(6) 0.9313(2) 0.0330(5) Uani 1 1 d . . . 
Cl1 Cl 0.4152(2) 0.12142(7) 1.0540(2) 0.0449(6) Uani 1 1 d . . . 
C2 C -0.0398(10) 0.0835(3) 0.7769(9) 0.040(2) Uani 1 1 d . . . 
O1 O -0.1094(7) 0.0617(2) 0.8191(7) 0.067(2) Uani 1 1 d . . . 
C1 C 0.2290(9) 0.0477(2) 0.8628(8) 0.0313(19) Uani 1 1 d . . . 
N1 N 0.2391(7) 0.01550(19) 0.9363(7) 0.0335(17) Uani 1 1 d . . . 
C3 C 0.2980(13) -0.0242(3) 0.9214(11) 0.061(3) Uani 1 1 d . . . 
H3A H 0.3794 -0.0317 1.0079 0.073 Uiso 1 1 calc R . . 
H3B H 0.3371 -0.0217 0.8555 0.073 Uiso 1 1 calc R . . 
C4 C 0.1817(19) -0.0575(4) 0.8757(16) 0.118(6) Uani 1 1 d . . . 
H4A H 0.1363 -0.0585 0.9360 0.177 Uiso 1 1 calc R . . 
H4B H 0.2280 -0.0830 0.8775 0.177 Uiso 1 1 calc R . . 
H4C H 0.1074 -0.0520 0.7848 0.177 Uiso 1 1 calc R . . 
C5 C 0.1952(11) 0.0178(3) 1.0492(9) 0.045(2) Uani 1 1 d . . . 
H5A H 0.1465 -0.0071 1.0533 0.054 Uiso 1 1 calc R . . 
H5B H 0.1263 0.0399 1.0331 0.054 Uiso 1 1 calc R . . 
C6 C 0.3322(14) 0.0243(4) 1.1820(11) 0.080(4) Uani 1 1 d . . . 
H6A H 0.3883 -0.0003 1.2088 0.121 Uiso 1 1 calc R . . 
H6B H 0.3036 0.0322 1.2510 0.121 Uiso 1 1 calc R . . 
H6C H 0.3919 0.0452 1.1707 0.121 Uiso 1 1 calc R . . 
C11 C 0.2735(9) 0.0454(2) 0.7524(8) 0.032(2) Uani 1 1 d . . . 
C12 C 0.1985(12) 0.0211(3) 0.6371(11) 0.060(3) Uani 1 1 d . . . 
H12 H 0.1205 0.0046 0.6298 0.073 Uiso 1 1 calc R . . 
C13 C 0.2419(14) 0.0219(4) 0.5337(10) 0.070(3) Uani 1 1 d . . . 
H13 H 0.1917 0.0059 0.4570 0.084 Uiso 1 1 calc R . . 
C14 C 0.3556(16) 0.0455(3) 0.5414(12) 0.072(4) Uani 1 1 d . . . 
H14 H 0.3839 0.0454 0.4716 0.086 Uiso 1 1 calc R . . 
C15 C 0.4283(13) 0.0695(3) 0.6549(12) 0.065(3) Uani 1 1 d . . . 
H15 H 0.5067 0.0857 0.6618 0.078 Uiso 1 1 calc R . . 
C16 C 0.3869(11) 0.0698(3) 0.7560(9) 0.044(2) Uani 1 1 d . . . 
H16 H 0.4360 0.0868 0.8302 0.053 Uiso 1 1 calc R . . 
C21 C -0.1087(9) 0.0948(2) 0.6284(9) 0.037(2) Uani 1 1 d . . . 
C22 C -0.2553(10) 0.0852(3) 0.5450(10) 0.055(3) Uani 1 1 d . . . 
H22 H -0.3088 0.0697 0.5784 0.066 Uiso 1 1 calc R . . 
C23 C -0.3211(13) 0.0986(3) 0.4137(11) 0.070(3) Uani 1 1 d . . . 
H23 H -0.4200 0.0923 0.3579 0.084 Uiso 1 1 calc R . . 
C24 C -0.2415(14) 0.1214(4) 0.3627(12) 0.075(4) Uani 1 1 d . . . 
H24 H -0.2874 0.1302 0.2728 0.090 Uiso 1 1 calc R . . 
C25 C -0.0954(13) 0.1312(4) 0.4440(11) 0.073(3) Uani 1 1 d . . . 
H25 H -0.0421 0.1469 0.4109 0.087 Uiso 1 1 calc R . . 
C26 C -0.0298(11) 0.1169(3) 0.5768(9) 0.049(3) Uani 1 1 d . . . 
H26 H 0.0698 0.1224 0.6322 0.059 Uiso 1 1 calc R . . 
C31 C 0.1185(9) 0.2089(3) 0.8606(9) 0.037(2) Uani 1 1 d . . . 
C32 C 0.2438(12) 0.2075(3) 0.8420(12) 0.065(3) Uani 1 1 d . . . 
H32 H 0.3033 0.1845 0.8680 0.078 Uiso 1 1 calc R . . 
C33 C 0.2832(17) 0.2400(4) 0.7844(17) 0.107(6) Uani 1 1 d . . . 
H33 H 0.3705 0.2391 0.7753 0.128 Uiso 1 1 calc R . . 
C34 C 0.1950(18) 0.2725(4) 0.7423(15) 0.098(5) Uani 1 1 d . . . 
H34 H 0.2192 0.2935 0.6998 0.117 Uiso 1 1 calc R . . 
C35 C 0.0708(15) 0.2752(3) 0.7606(14) 0.084(4) Uani 1 1 d . . . 
H35 H 0.0124 0.2984 0.7339 0.100 Uiso 1 1 calc R . . 
C36 C 0.0324(12) 0.2435(3) 0.8189(12) 0.062(3) Uani 1 1 d . . . 
H36 H -0.0533 0.2452 0.8305 0.075 Uiso 1 1 calc R . . 
C41 C 0.1297(9) 0.1760(2) 1.1108(9) 0.035(2) Uani 1 1 d . . . 
C42 C 0.1780(12) 0.1445(3) 1.2060(10) 0.060(3) Uani 1 1 d . . . 
H42 H 0.1828 0.1182 1.1778 0.072 Uiso 1 1 calc R . . 
C43 C 0.2183(14) 0.1521(4) 1.3412(12) 0.081(4) Uani 1 1 d . . . 
H43 H 0.2507 0.1310 1.4036 0.097 Uiso 1 1 calc R . . 
C44 C 0.2116(12) 0.1898(4) 1.3842(11) 0.067(3) Uani 1 1 d . . . 
H44 H 0.2386 0.1944 1.4759 0.080 Uiso 1 1 calc R . . 
C45 C 0.1655(11) 0.2213(3) 1.2947(11) 0.058(3) Uani 1 1 d . . . 
H45 H 0.1620 0.2473 1.3250 0.069 Uiso 1 1 calc R . . 
C46 C 0.1243(10) 0.2142(3) 1.1599(11) 0.051(3) Uani 1 1 d . . . 
H46 H 0.0917 0.2358 1.0992 0.062 Uiso 1 1 calc R . . 
C51 C -0.1340(9) 0.1687(2) 0.8617(9) 0.036(2) Uani 1 1 d . . . 
C52 C -0.2195(10) 0.1752(3) 0.7235(10) 0.043(2) Uani 1 1 d . . . 
H52 H -0.1743 0.1799 0.6673 0.052 Uiso 1 1 calc R . . 
C53 C -0.3729(12) 0.1745(3) 0.6696(11) 0.059(3) Uani 1 1 d . . . 
H53 H -0.4297 0.1783 0.5765 0.071 Uiso 1 1 calc R . . 
C54 C -0.4425(12) 0.1684(3) 0.7502(14) 0.065(3) Uani 1 1 d . . . 
H54 H -0.5455 0.1686 0.7127 0.078 Uiso 1 1 calc R . . 
C55 C -0.3591(12) 0.1621(3) 0.8860(14) 0.062(3) Uani 1 1 d . . . 
H55 H -0.4062 0.1575 0.9408 0.074 Uiso 1 1 calc R . . 
C56 C -0.2025(10) 0.1622(3) 0.9453(10) 0.046(2) Uani 1 1 d . . . 
H56 H -0.1464 0.1580 1.0383 0.055 Uiso 1 1 calc R . . 
  
loop_ 
 _atom_site_aniso_label 
 _atom_site_aniso_U_11 
 _atom_site_aniso_U_22 
 _atom_site_aniso_U_33 
 _atom_site_aniso_U_23 
 _atom_site_aniso_U_13 
 _atom_site_aniso_U_12 
Pd1 0.0252(4) 0.0287(3) 0.0321(4) 0.0017(3) 0.0131(3) 0.0011(3) 
P1 0.0301(13) 0.0296(12) 0.0433(14) 0.0011(10) 0.0200(11) 0.0019(10) 
Cl1 0.0300(12) 0.0563(14) 0.0402(13) -0.0054(11) 0.0084(11) -0.0020(11) 
C2 0.038(5) 0.030(5) 0.055(6) 0.006(4) 0.024(5) 0.002(4) 
O1 0.046(4) 0.078(5) 0.071(5) 0.030(4) 0.022(4) -0.016(4) 
C1 0.023(5) 0.037(5) 0.029(5) 0.003(4) 0.006(4) 0.001(4) 
N1 0.036(4) 0.026(4) 0.037(4) -0.001(3) 0.015(3) -0.001(3) 
C3 0.089(9) 0.035(6) 0.072(8) 0.014(5) 0.047(7) 0.023(6) 
C4 0.203(18) 0.056(8) 0.160(15) -0.027(9) 0.139(15) -0.027(10) 
C5 0.057(6) 0.042(6) 0.049(6) 0.006(5) 0.035(5) -0.001(5) 
C6 0.104(10) 0.095(10) 0.043(7) -0.002(6) 0.033(7) -0.009(8) 
C11 0.033(5) 0.033(5) 0.030(5) -0.001(4) 0.014(4) 0.004(4) 
C12 0.061(7) 0.059(7) 0.063(7) -0.006(6) 0.030(6) -0.008(6) 
C13 0.098(10) 0.079(9) 0.037(6) -0.020(6) 0.034(7) 0.001(7) 
C14 0.123(12) 0.065(8) 0.060(8) 0.007(6) 0.071(8) 0.016(8) 
C15 0.082(9) 0.063(7) 0.070(8) -0.002(6) 0.053(7) -0.003(6) 
C16 0.063(7) 0.032(5) 0.050(6) -0.010(4) 0.037(5) -0.005(5) 
C21 0.032(5) 0.036(5) 0.039(5) -0.009(4) 0.011(4) 0.000(4) 
C22 0.030(6) 0.063(7) 0.058(7) -0.004(5) 0.008(5) -0.006(5) 
C23 0.051(7) 0.075(8) 0.054(7) -0.015(6) -0.003(6) 0.011(6) 
C24 0.060(8) 0.095(10) 0.050(7) 0.002(7) 0.007(7) 0.016(7) 
C25 0.065(8) 0.106(10) 0.045(7) 0.021(6) 0.023(6) 0.008(7) 
C26 0.041(6) 0.062(7) 0.034(6) 0.010(5) 0.008(5) -0.007(5) 
C31 0.029(5) 0.033(5) 0.052(6) 0.004(4) 0.019(4) 0.003(4) 
C32 0.059(7) 0.046(6) 0.109(10) 0.020(6) 0.054(7) 0.007(5) 
C33 0.103(12) 0.068(9) 0.205(17) 0.035(10) 0.118(13) 0.005(8) 
C34 0.129(13) 0.058(8) 0.145(13) 0.038(8) 0.096(12) 0.015(9) 
C35 0.102(11) 0.036(6) 0.136(12) 0.046(7) 0.074(10) 0.027(6) 
C36 0.040(6) 0.052(7) 0.096(9) 0.010(6) 0.032(6) 0.001(5) 
C41 0.037(5) 0.031(5) 0.044(5) -0.008(4) 0.025(5) 0.000(4) 
C42 0.080(8) 0.054(7) 0.048(7) 0.005(5) 0.030(6) 0.013(6) 
C43 0.107(11) 0.089(10) 0.050(8) 0.019(7) 0.039(8) 0.036(8) 
C44 0.070(8) 0.095(10) 0.047(7) -0.022(7) 0.036(6) -0.003(7) 
C45 0.057(7) 0.058(7) 0.057(7) -0.022(6) 0.024(6) -0.010(6) 
C46 0.048(6) 0.035(5) 0.065(7) -0.008(5) 0.020(5) -0.002(5) 
C51 0.026(5) 0.026(5) 0.058(6) 0.000(4) 0.020(5) 0.000(4) 
C52 0.030(5) 0.046(6) 0.052(6) -0.001(5) 0.017(5) 0.007(4) 
C53 0.061(8) 0.049(6) 0.059(7) -0.007(5) 0.018(6) 0.008(5) 
C54 0.036(6) 0.055(7) 0.091(10) -0.010(7) 0.017(7) -0.005(5) 
C55 0.049(7) 0.050(6) 0.109(10) -0.001(7) 0.055(7) -0.008(5) 
C56 0.038(6) 0.050(6) 0.057(6) 0.001(5) 0.028(5) -0.004(5) 
  
_geom_special_details 
; 
 All esds (except the esd in the dihedral angle between two l.s. planes) 
 are estimated using the full covariance matrix.  The cell esds are taken 
 into account individually in the estimation of esds in distances, angles 
 and torsion angles; correlations between esds in cell parameters are only 
 used when they are defined by crystal symmetry.  An approximate (isotropic) 
 treatment of cell esds is used for estimating esds involving l.s. planes. 
; 
  
loop_ 
 _geom_bond_atom_site_label_1 
 _geom_bond_atom_site_label_2 
 _geom_bond_distance 
 _geom_bond_site_symmetry_2 
 _geom_bond_publ_flag 
Pd1 C2 1.969(9) . ? 
Pd1 C1 2.048(8) . ? 
Pd1 P1 2.352(2) . ? 
Pd1 Cl1 2.438(2) . ? 
P1 C41 1.818(9) . ? 
P1 C31 1.825(9) . ? 
P1 C51 1.829(8) . ? 
C2 O1 1.231(10) . ? 
C2 C21 1.506(12) . ? 
C1 N1 1.311(10) . ? 
C1 C11 1.471(11) . ? 
N1 C3 1.479(10) . ? 
N1 C5 1.494(11) . ? 
C3 C4 1.521(16) . ? 
C5 C6 1.510(14) . ? 
C11 C16 1.385(12) . ? 
C11 C12 1.401(12) . ? 
C12 C13 1.388(14) . ? 
C13 C14 1.356(15) . ? 
C14 C15 1.380(15) . ? 
C15 C16 1.350(13) . ? 
C21 C26 1.376(12) . ? 
C21 C22 1.382(12) . ? 
C22 C23 1.363(14) . ? 
C23 C24 1.390(16) . ? 
C24 C25 1.377(15) . ? 
C25 C26 1.387(13) . ? 
C31 C32 1.368(12) . ? 
C31 C36 1.383(12) . ? 
C32 C33 1.392(14) . ? 
C33 C34 1.338(16) . ? 
C34 C35 1.356(16) . ? 
C35 C36 1.372(14) . ? 
C41 C46 1.384(11) . ? 
C41 C42 1.400(12) . ? 
C42 C43 1.377(14) . ? 
C43 C44 1.344(15) . ? 
C44 C45 1.362(15) . ? 
C45 C46 1.367(13) . ? 
C51 C52 1.386(12) . ? 
C51 C56 1.391(12) . ? 
C52 C53 1.386(13) . ? 
C53 C54 1.369(15) . ? 
C54 C55 1.361(15) . ? 
C55 C56 1.413(13) . ? 
  
loop_ 
 _geom_angle_atom_site_label_1 
 _geom_angle_atom_site_label_2 
 _geom_angle_atom_site_label_3 
 _geom_angle 
 _geom_angle_site_symmetry_1 
 _geom_angle_site_symmetry_3 
 _geom_angle_publ_flag 
C2 Pd1 C1 84.8(3) . . ? 
C2 Pd1 P1 91.6(3) . . ? 
C1 Pd1 P1 176.4(2) . . ? 
C2 Pd1 Cl1 175.7(3) . . ? 
C1 Pd1 Cl1 91.2(2) . . ? 
P1 Pd1 Cl1 92.33(8) . . ? 
C41 P1 C31 106.1(4) . . ? 
C41 P1 C51 102.6(4) . . ? 
C31 P1 C51 103.8(4) . . ? 
C41 P1 Pd1 111.8(3) . . ? 
C31 P1 Pd1 115.1(3) . . ? 
C51 P1 Pd1 116.2(3) . . ? 
O1 C2 C21 119.2(8) . . ? 
O1 C2 Pd1 121.2(7) . . ? 
C21 C2 Pd1 119.6(6) . . ? 
N1 C1 C11 119.8(7) . . ? 
N1 C1 Pd1 122.9(6) . . ? 
C11 C1 Pd1 117.3(6) . . ? 
C1 N1 C3 125.1(7) . . ? 
C1 N1 C5 120.0(7) . . ? 
C3 N1 C5 114.8(7) . . ? 
N1 C3 C4 112.9(9) . . ? 
N1 C5 C6 109.1(8) . . ? 
C16 C11 C12 117.7(8) . . ? 
C16 C11 C1 119.9(8) . . ? 
C12 C11 C1 122.3(8) . . ? 
C13 C12 C11 119.2(10) . . ? 
C14 C13 C12 121.8(10) . . ? 
C13 C14 C15 118.6(10) . . ? 
C16 C15 C14 120.8(11) . . ? 
C15 C16 C11 121.8(9) . . ? 
C26 C21 C22 119.5(9) . . ? 
C26 C21 C2 120.4(8) . . ? 
C22 C21 C2 120.0(9) . . ? 
C23 C22 C21 119.8(10) . . ? 
C22 C23 C24 120.5(11) . . ? 
C25 C24 C23 120.6(11) . . ? 
C24 C25 C26 118.1(11) . . ? 
C21 C26 C25 121.5(10) . . ? 
C32 C31 C36 117.7(9) . . ? 
C32 C31 P1 119.3(7) . . ? 
C36 C31 P1 123.0(7) . . ? 
C31 C32 C33 120.8(10) . . ? 
C34 C33 C32 119.7(12) . . ? 
C33 C34 C35 121.2(11) . . ? 
C34 C35 C36 119.3(10) . . ? 
C35 C36 C31 121.3(10) . . ? 
C46 C41 C42 116.7(9) . . ? 
C46 C41 P1 123.4(7) . . ? 
C42 C41 P1 119.8(7) . . ? 
C43 C42 C41 120.3(10) . . ? 
C44 C43 C42 120.8(11) . . ? 
C43 C44 C45 120.5(10) . . ? 
C44 C45 C46 119.5(10) . . ? 
C45 C46 C41 122.1(10) . . ? 
C52 C51 C56 119.8(8) . . ? 
C52 C51 P1 119.9(7) . . ? 
C56 C51 P1 120.1(7) . . ? 
C51 C52 C53 119.6(9) . . ? 
C54 C53 C52 121.5(10) . . ? 
C55 C54 C53 119.2(10) . . ? 
C54 C55 C56 121.3(10) . . ? 
C51 C56 C55 118.6(10) . . ? 
  
_diffrn_measured_fraction_theta_max    1.000 
_diffrn_reflns_theta_full              24.71 
_diffrn_measured_fraction_theta_full   1.000 
_refine_diff_density_max    0.745 
_refine_diff_density_min   -1.048 
_refine_diff_density_rms    0.129 

#===END
  


  
